# Supplementary material for: A living organoid biobank of patients with Crohn’s disease reveals molecular subtypes for personalized therapeutics
Source: PubMed Central journal article supplement (PMC11513829; doi:10.1016/j.xcrm.2024.101748), 2024-09-26
Supplement: mmc1.pdf [file mmc1.pdf]

**Cell Reports Medicine, Volume 5**

**Supplemental information**

**A living organoid biobank of patients  
with Crohn's disease reveals molecular  
subtypes for personalized therapeutics**

**Courtney Tindle, Ayden G. Fonseca, Sahar Taheri, Gajanan D. Katkar, Jasper Lee, Priti Maity, Ibrahim M. Sayed, Stella-Rita Ibeawuchi, Eleadah Vidales, Rama F. Pranadinata, Mackenzie Fuller, Dominik L. Stec, Mahitha Shree Anandachar, Kevin Perry, Helen N. Le, Jason Ear, Brigid S. Boland, William J. Sandborn, Debashis Sahoo, Soumita Das, and Pradipta Ghosh**

## SUPPLEMENTAL INFORMATION

# A Living Organoid Biobank of Crohn's Disease Patients Reveals Molecular Subtypes for Personalized Therapeutics

### Authors:

Courtney Tindle<sup>1,2\*</sup>, Ayden G. Fonseca<sup>1,2\*</sup>, Sahar Taheri<sup>3\*</sup>, Gajanan D. Katkar<sup>1\*</sup>, Jasper Lee<sup>4</sup>, Priti Maity<sup>1,2</sup>, Ibrahim M. Sayed<sup>4</sup>, Stella-Rita Ibeawuchi<sup>4</sup>, Eleadah Vidales<sup>1,2</sup>, Rama F. Pranadinata<sup>1,2</sup>, Mackenzie Fuller<sup>1,2</sup>, Dominik L. Stec<sup>1,2</sup>, Mahitha Shree Anandachar<sup>4</sup>, Kevin Perry<sup>1,2</sup>, Helen N. Le<sup>5</sup>, Jason Ear<sup>1</sup>, Brigid S. Boland<sup>5†</sup>, William J. Sandborn<sup>5†</sup>, Debashis Sahoo<sup>3,6†</sup>, Soumita Das<sup>2,4†</sup> and Pradipta Ghosh<sup>1,2,5†¶</sup>

### Affiliations:

<sup>1</sup>Department of Cellular and Molecular Medicine, University of California San Diego, La Jolla, CA, 92093.

<sup>2</sup>HUMANOID™ Center of Research Excellence (CoRE), University of California San Diego, La Jolla, CA, 92093.

<sup>3</sup>Department of Computer Science and Engineering, Jacobs School of Engineering, University of California San Diego, La Jolla, CA, 92093.

<sup>4</sup>Department of Pathology, University of California San Diego, La Jolla, CA, 92093.

<sup>5</sup>Department of Medicine, University of California San Diego, La Jolla, CA, 92093.

<sup>6</sup>Department of Pediatrics, University of California San Diego, La Jolla, CA, 92093.

\* Equal contribution

**Keywords:** Patient-derived organoids, inflammatory bowel disease, barrier integrity, host-microbe interaction, therapeutics

### †Senior corresponding authors:

**Brigid S. Boland, M.D.;** [bboland@health.ucsd.edu](mailto:bboland@health.ucsd.edu)

**William J. Sandborn, M.D.;** [wsandborn@health.ucsd.edu](mailto:wsandborn@health.ucsd.edu)

**Debashis Sahoo, Ph.D.;** [dsahoo@ucsd.edu](mailto:dsahoo@ucsd.edu)

**Soumita Das, Ph.D.;** [sodas@ucsd.edu](mailto:sodas@ucsd.edu)

### ¶Lead contact:

**Pradipta Ghosh, M.D.;** [prghosh@ucsd.edu](mailto:prghosh@ucsd.edu)

39

## **INVENTORY OF SUPPLEMENTARY MATERIALS**

40

- Supplemental Figure and Legends (Figure S1-S12)

41

- Supplemental Tables (Uploaded separately as Excel spreadsheets; Table S1-S7)

42

1 SUPPLEMENTAL FIGURE AND LEGENDS

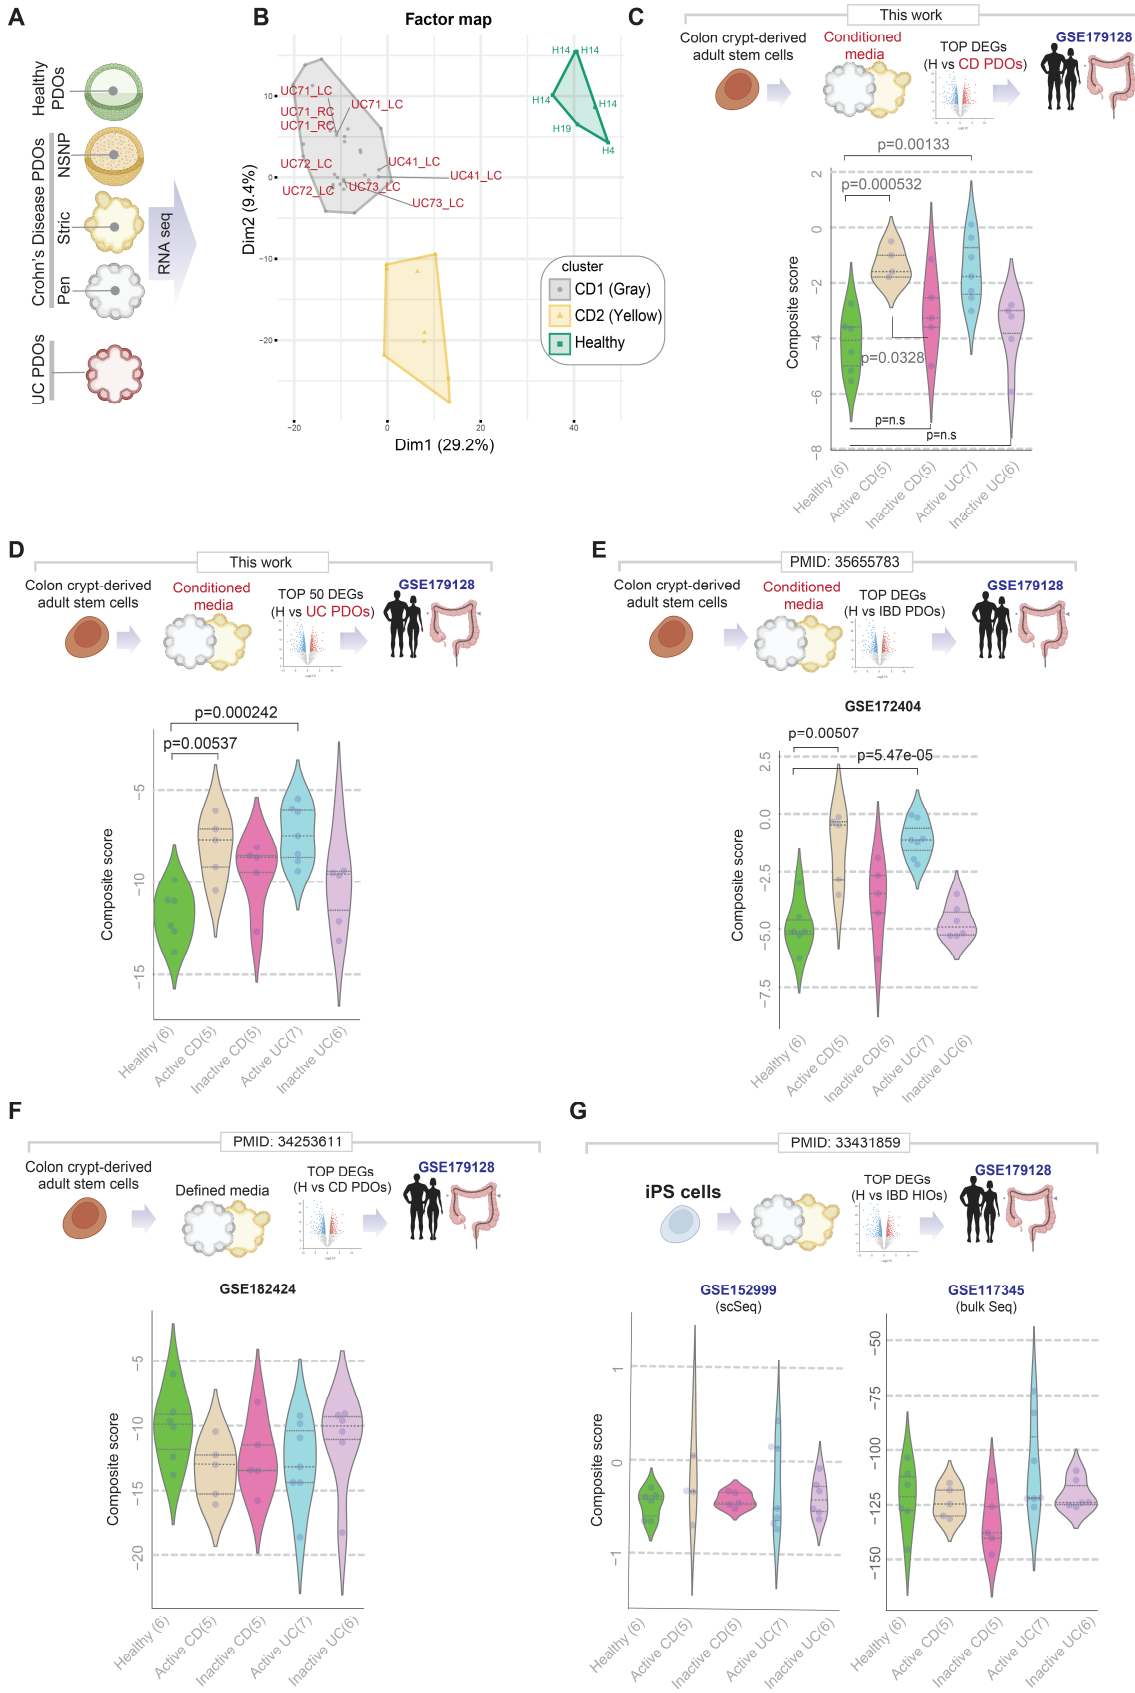

2  
3 **Figure S1 [Related to Figure 2]**



1 **Benchmarking PDOs as tools for disease modeling: An objective comparison of adult stem cell derived**  
2 **CD-PDOs (this work) against UC-PDOs and other IBD-PDOs from various laboratories.**

3 **A.** Schematic showing the overall rationale and study design for the transcriptomic studies on healthy and CD-PDOs.

4 **B.** A factorial map generated by performing the Hierarchical Clustering on principal components (HCPC) analysis is plotted  
5 onto the first two dimensions. HCPC was used to compute hierarchical clustering on principal components indicates the  
6 division of the H (healthy), UC- and CD-PDOs into three distinct clusters (see [Figure 2B](#)): gray and yellow, which are  
7 differentiated from healthy controls (green). For simplification, CD-PDO annotations are removed, and only UC-PDOs are  
8 highlighted. All 10 UC-PDOs analyzed here, were found in the gray cluster with CD-PDOs; none were found in the yellow  
9 cluster.

10 **C.** *Top:* Schematic outlines the strategy used to objectively assess the ability of CD-PDOs to recapitulate the microdissected  
11 epithelium from the colons of UC or CD patients, whose disease activities were clinically determined to be active or inactive  
12 disease (GSE179128). *Bottom:* Violin plots show the composite score of the PDO-derived top DEGs in the microdissected  
13 colonic epithelium. Values in parenthesis indicate unique patients. List of DEGs is provided in [Table S4](#).

14 **D.** *Top:* Schematic outlines the strategy used to objectively assess the ability of UC-PDOs to recapitulate the microdissected  
15 epithelium from the colons of UC or CD patients, whose disease activities were clinically determined to be active or inactive  
16 disease (GSE179128). *Bottom:* Violin plots show the composite score of the PDO-derived top DEGs in the microdissected  
17 colonic epithelium. Values in parenthesis indicate unique patients.

18 **E-G.** *Top:* Schematics outline the strategy used to objectively assess the ability of colonoids, generated either of adult stem  
19 cells of healthy or IBD-afflicted colons (E-F) or iPS-cells from healthy or IBD-afflicted patients (G) to recapitulate the  
20 microdissected epithelium from the colons of UC and CD patients, whose disease activities were clinically determined to be  
21 active or inactive disease (GSE179128). *Bottom:* Violin plots show the composite score of the organoid-derived top  
22 upregulated DEGs in each study (indicated with a PMID#) in the microdissected colonic epithelium. Values in parenthesis  
23 indicate unique patients.

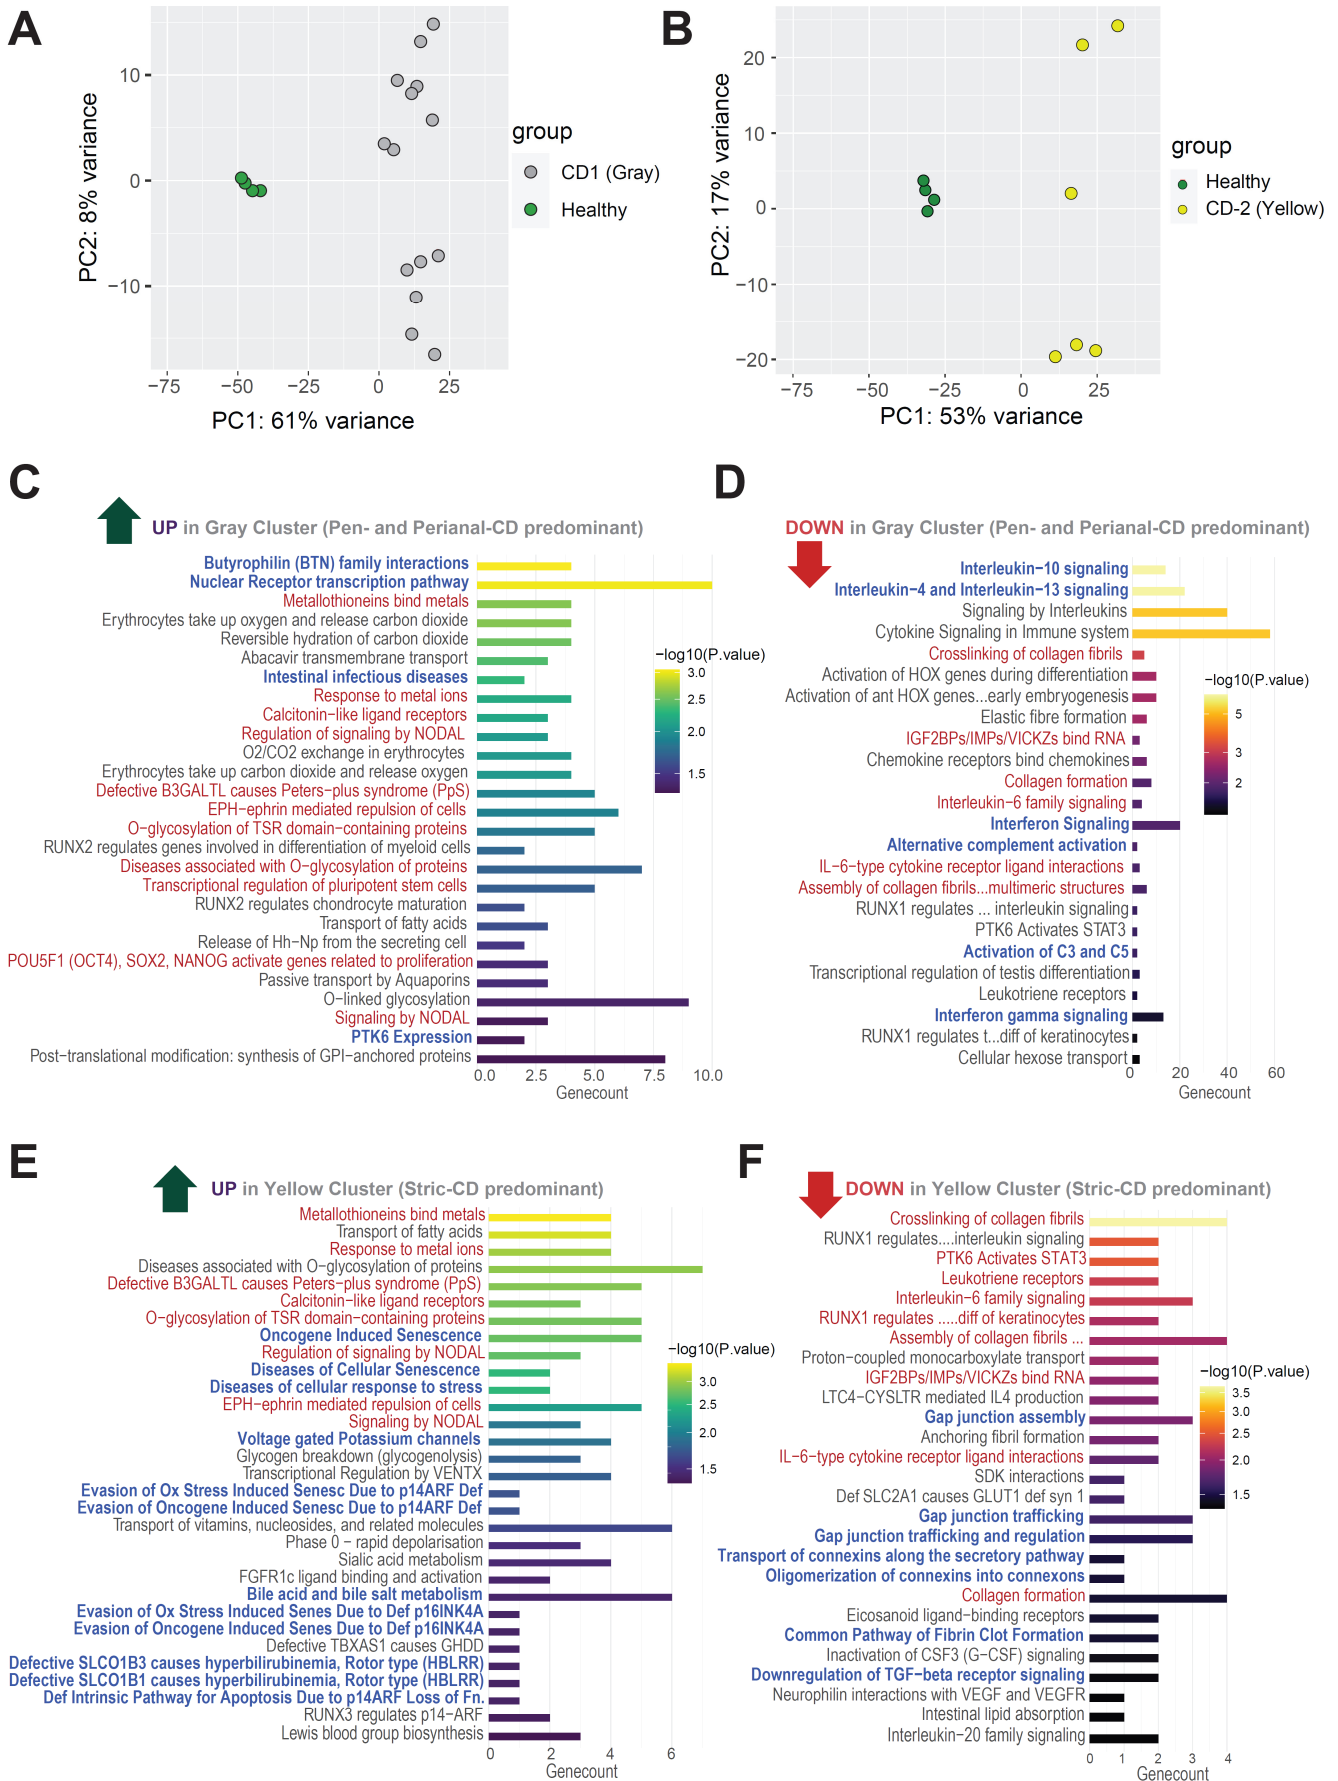

Figure S2 [Related to Figure 2]

1 **Analysis of differentially expressed genes (DEGs) and cellular processes and pathways in the CD-**  
2 **PDOs (gray or yellow clusters) vs healthy PDOs.**

3 **A-B.** Two-dimensional PCA plots showing clustering of the healthy control PDOs (green) and CD-(molecular) subtypes  
4 (gray or yellow) samples.

5 **C-F.** Enriched pathways from the differential gene expression analyses by DESeq2 with log2 fold changes (LFC)=1 and  
6 false discovery rates (FDR) = 0.05. Reactome pathway analysis of Up/Down-regulated genes in the gray/yellow cluster.  
7 The vertical axes are the enriched pathways, and the horizontal axes are the number of DE genes in each enriched  
8 pathway.

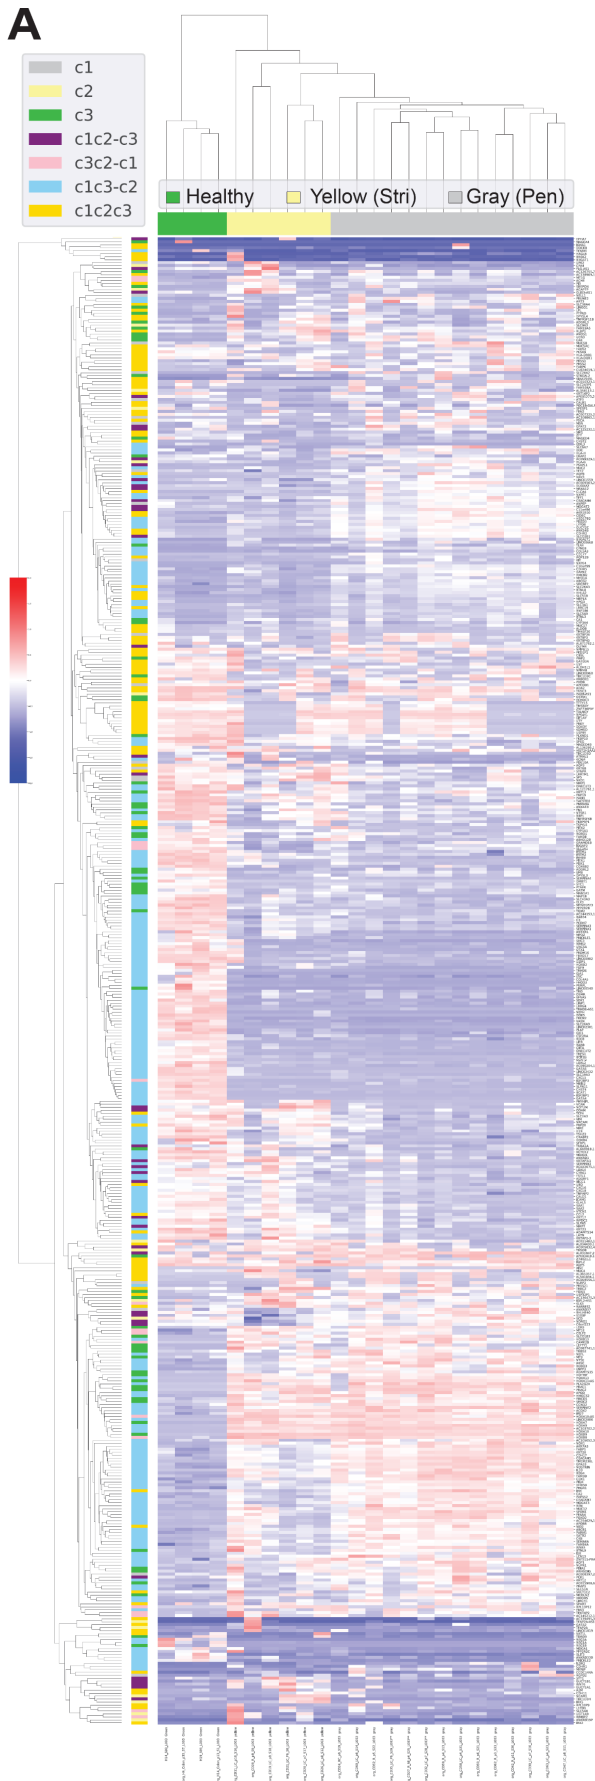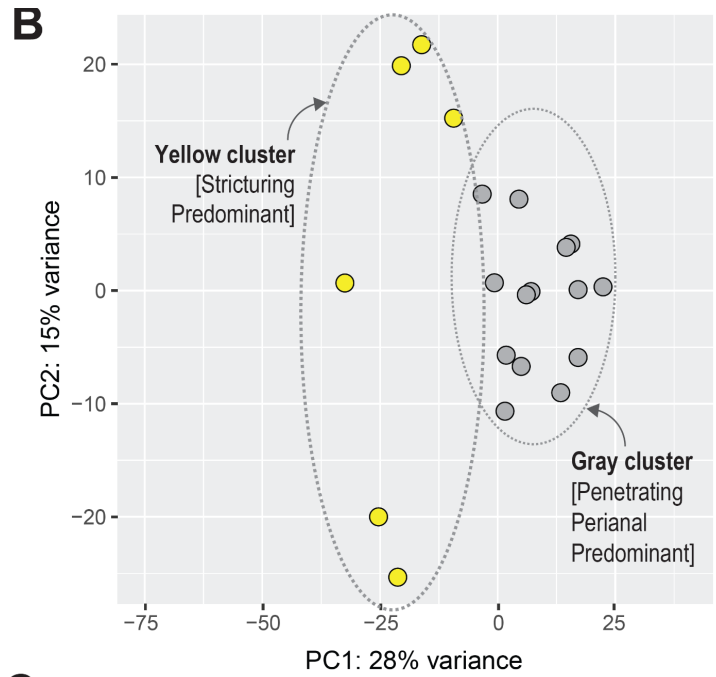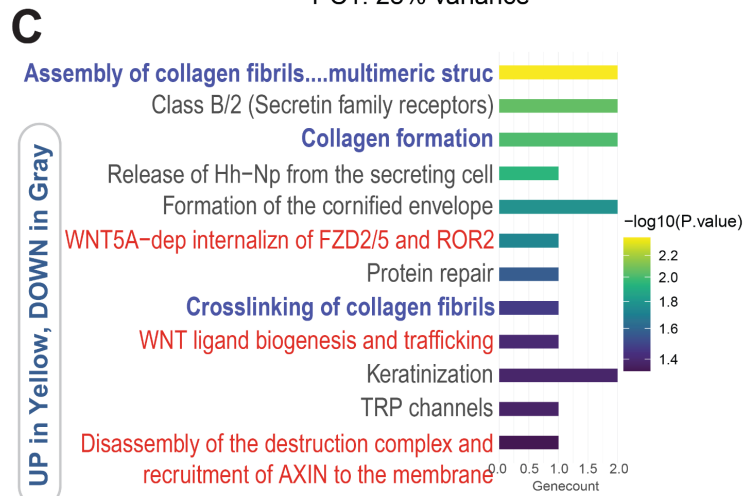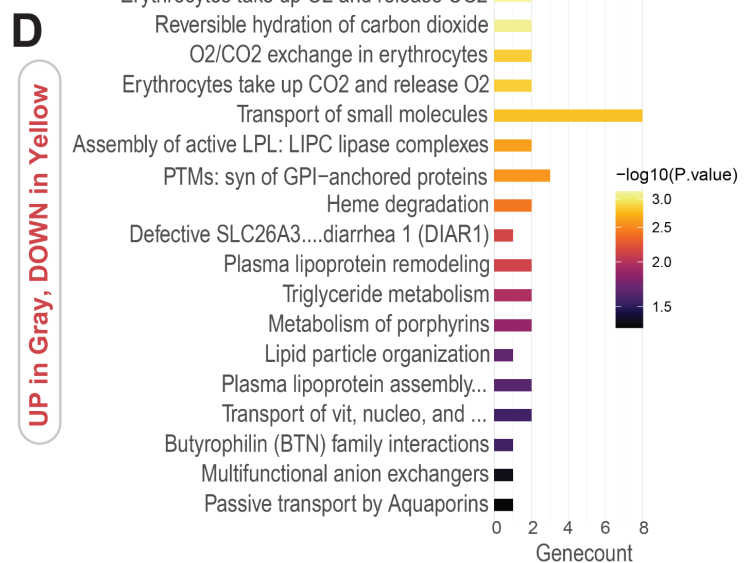

Figure S3 [Related to Figure 2]

1 **Analysis of differentially expressed genes (DEGs) and cellular processes and pathways in gray vs**  
2 **yellow CD-PDOs.**

3 **A.** Unsupervised hierarchical clustering of the top 500 most genes with the highest variance used in clustering by PCA in  
4 **Figure 2B.** C1 shows the genes that describe the cluster of gray samples or characterize the CD-PDOs in the gray  
5 cluster. C2 shows the genes that describe the CD-PDOs in the yellow cluster. C3 shows the genes that describe the healthy  
6 PDOs in the green cluster. C1C2\_C3 shows the genes that describe both gray and yellow CD-PDO samples but not the  
7 PDOs in the healthy green cluster. C1C2C3 shows the genes that describe all clusters.

8 **B.** Two-dimensional PCA plots showing clustering of the gray and yellow CD-molecular subtypes

9 **C-D.** Enriched pathways from the differential gene expression analyses between gray and yellow CD-Subtypes by DESeq2  
10 with log2 fold changes (LFC) =1 and false discovery rate (FDR) = 0.05. Reactome pathway analysis of Up/Down-regulated  
11 genes in the gray cluster.

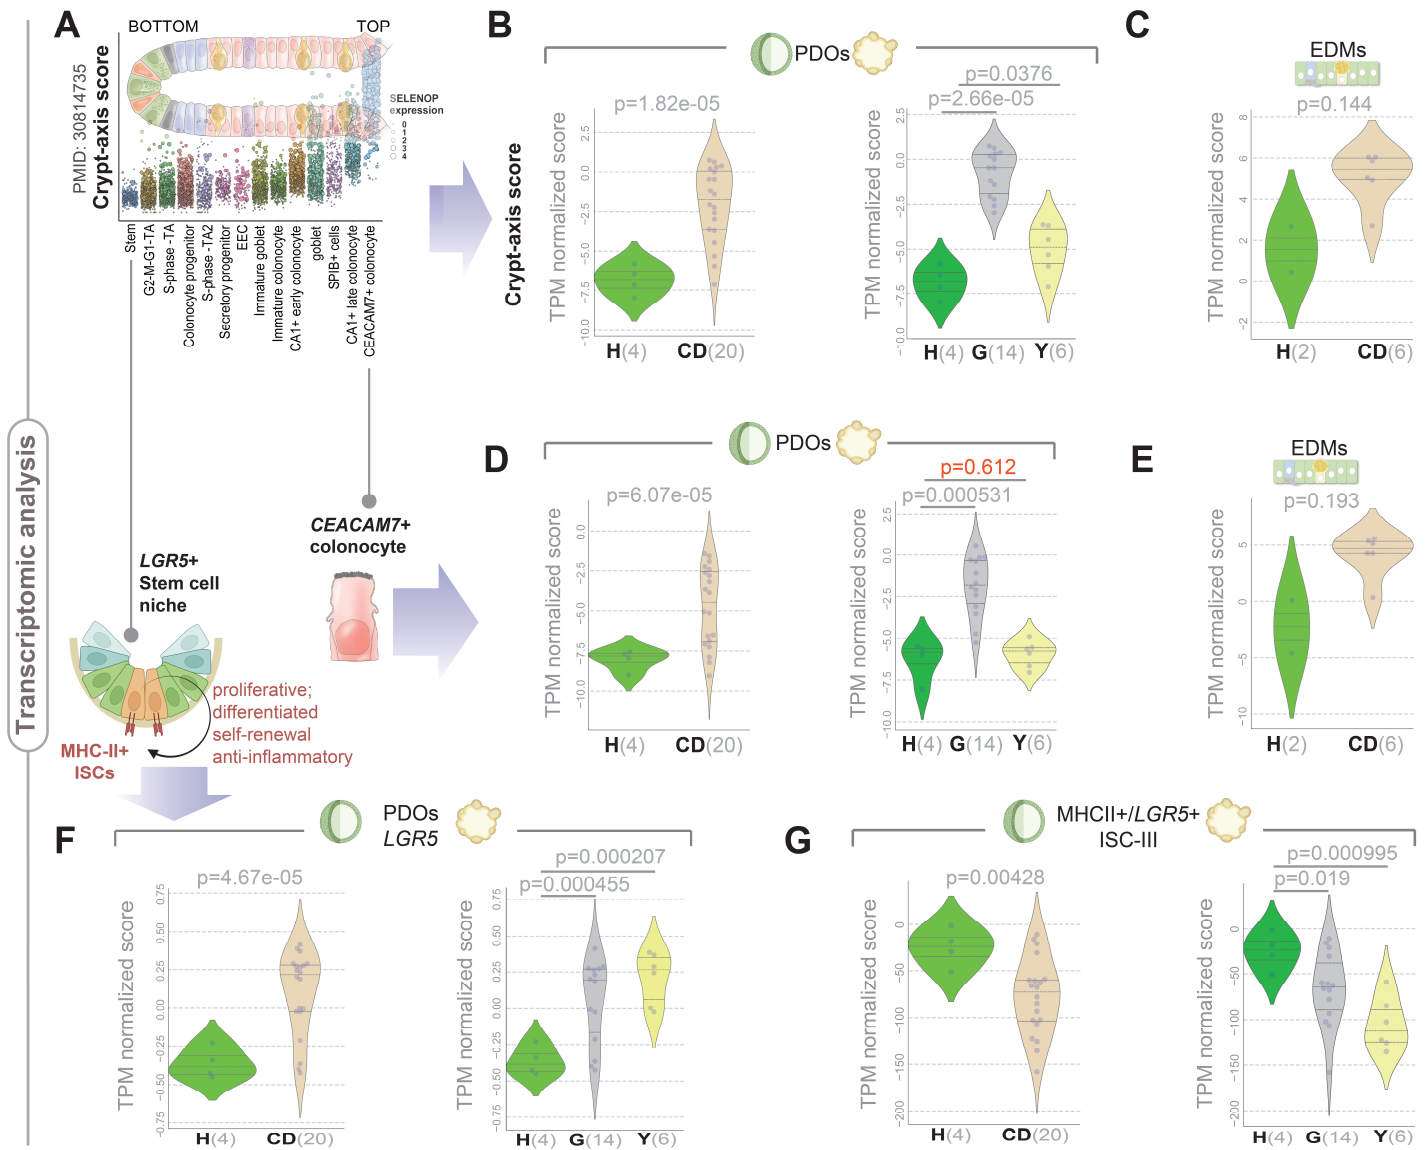

**Figure S4 [Related to Figure 2]**

**Two molecular subtypes of CD show shared and unique epithelium-intrinsic defects.**

**A.** Schematic shows the pseudo-spatial distribution of developing epithelial cells along the crypt-villus (base-top) axis. The axis score was derived by using the expression of selected crypt-villus axis markers as defined previously [S1, S2].

**B-C.** Violin plots show composite score of the set of genes that define crypt-axis score in CD-PDOs, grown either as 3D cultures (B) or differentiated into 2D EDMs (C). Statistical significance was determined by Welch's t-test. H, healthy; G, gray cluster; Y, yellow cluster.

**D-E.** Violin plots show composite score of the set of genes that define terminally differentiated CEACAM7+ brush border epithelium in CD-PDOs, grown either as 3D cultures (D) or differentiated into 2D EDMs (E). Statistical significance was determined by Welch's t-test. H, healthy; G, gray cluster; Y, yellow cluster.

**F-G.** Violin plots show LGR5 expression (F) or the expression of a composite score of genes that define a population of intestinal stem cells (G; ISC-III, MHCII+/LGR5+) in 3D cultures of CD-PDOs. Statistical significance was determined by Welch's t-test. H, healthy; G, gray cluster; Y, yellow cluster.

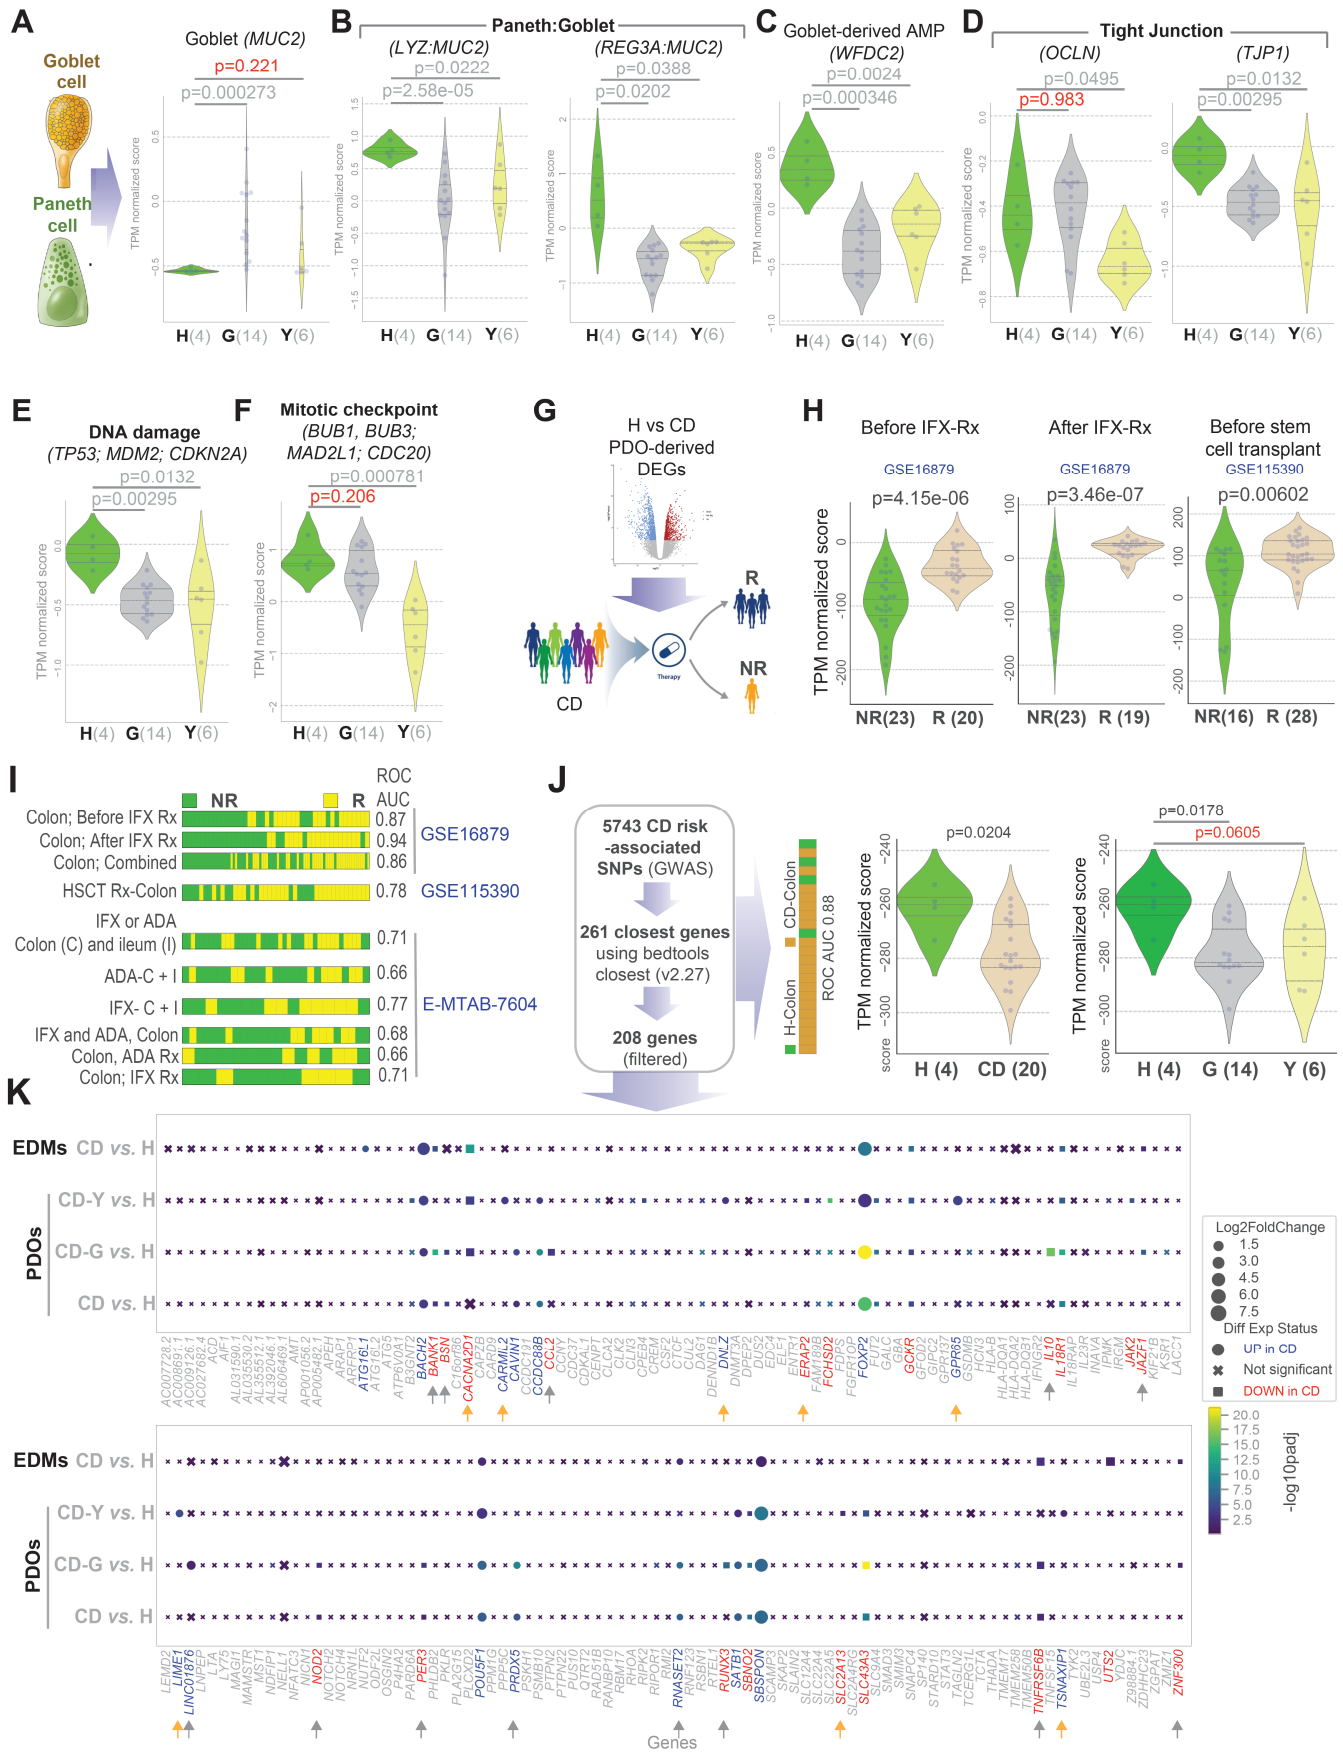

Figure S5 [Related to Figure 2]



## 1 Integration of transcriptomic information with cellular properties, therapeutic response, and genomics.

2 **A-C.** Schematic in A shows the two cell types analyzed in panels A-C. Violin plots show *MUC2* expression (A) or the  
3 expression of a composite score of genes representing Paneth and goblet cells (B; *LYZ:MUC2* and *REG3A:MUC2* ratios)  
4 and *WFDC2* expression (C) in 3D cultures of CD-PDOs. Statistical significance was determined by Welch's t-test. H, healthy;  
5 G, gray cluster; Y, yellow cluster.

6 **D-F.** Violin plots show the expression of tight junction genes (*OCLN* and *TJP1*) (D), DNA damage response-related genes  
7 (E) and genes that function as mitotic checkpoint (F) in 3D cultures of CD-PDOs. Statistical significance was determined by  
8 Welch's t-test. Red = insignificant p values. H, healthy; G, gray cluster; Y, yellow cluster.

9 **G.** Differential expression genes (DEGs) between healthy controls and CD-PDOs were used as gene signature on various  
10 publicly available transcriptomic datasets with documented outcome ("responders" vs. "non-responders") of a  
11 therapeutic intervention.

12 **H.** Violin plots show composite score of DEGs in the dataset [GSE16879](#) before (left), after (middle) treatment with the anti-  
13 TNF $\alpha$  drug, Infliximab. Violin plots show composite score of DEGs in the [GSE115390](#) dataset (right) where patients with  
14 refractory CD received autologous hematopoietic stem cell transplant (HSCT) as the therapeutic modality. R, responder  
15 samples; NR, non-responder. Statistical significance was analyzed by Welch's t-test.

16 **I.** Bar plots show sample order obtained using our signatures (PDO DEGs; see **Table S4**) can distinguish responders (R)  
17 from non-responders (NR) of therapeutic interventions: (i) before, and after anti-TNF $\alpha$  ([GSE16879](#)), (ii) before stem cell  
18 transplant ([GSE115390](#)), and (iii) with infliximab or adalimumab treatments ([E-MTAB-7604](#)). IFX, infliximab;  
19 ADA, adalimumab. ROC AUC values are displayed.

20 **J.** The levels of expression of a list of 208 unique genes nearest to the 5743 CD risk-associated SNPs identified through  
21 GWAS [S3] that were present also in the current dataset were analyzed. The violin plots show the differences between  
22 CD-(molecular)subtypes (gray or yellow cluster). Statistical significances in all panels were determined by Welch's t-test.  
23 The gray samples have more of the genes downregulated than the yellow ones.

24 **K.** Dot plots show the absolute log<sub>2</sub> fold change of control samples compared to the CD samples in the four sub-datasets  
25 (rows), the differential expression status of CD-associated risk genes (columns) present in all four sub-datasets, and the  
26 statistical significance of those genes based on the padj value. The dots' magnitude is absolute (log<sub>2</sub> fold change), their  
27 shape is the differential expression status, and their colors show the adjusted p-value of the comparison. Blue font = UP in  
28 CD over healthy. Red font = DOWN in CD over healthy. Yellow and Gray arrows point to the genes that are uniquely  
29 differentially expressed in yellow/gray cluster.



**A**

| Genetic contribution explained | Phenotypes in inflammatory bowel disease: the contribution of genetics |
|--------------------------------|------------------------------------------------------------------------|
| ✓                              | UC, CD-Colonic, CD-ileocolonic, CD-ileal                               |
| ✗                              | UC (Extent of Disease)                                                 |
| ✗                              | CD (Behavior of Disease: B1, B2, B3, Perianal)                         |
| ✗                              | Therapeutic Response, Resistance                                       |
| ✗                              | Upper GI tract involvement in CD                                       |
| ✗                              | EIM, extra-intestinal manifestations                                   |

PMID: 26490194; Lancet, 2016

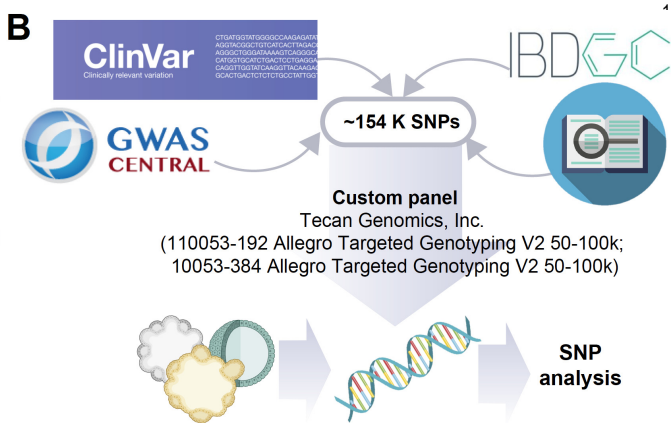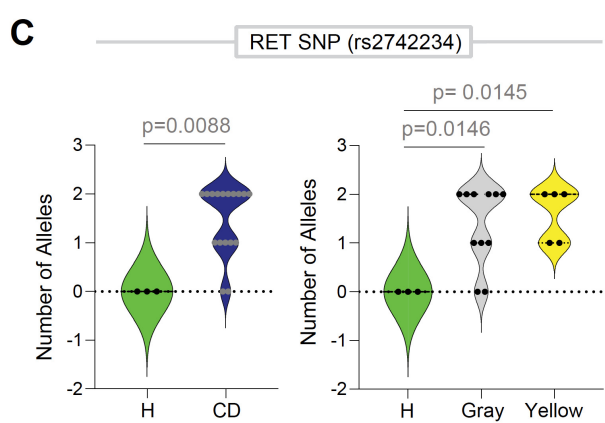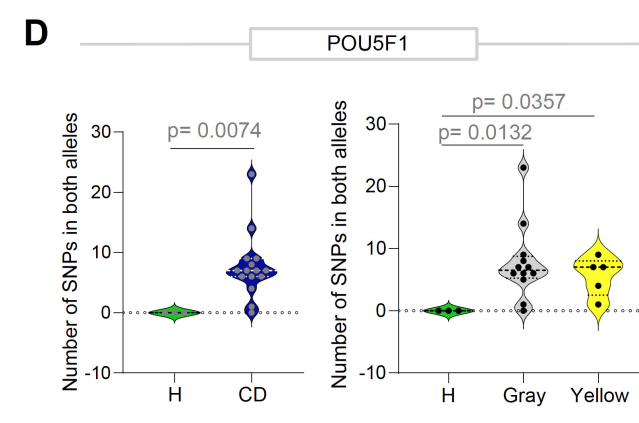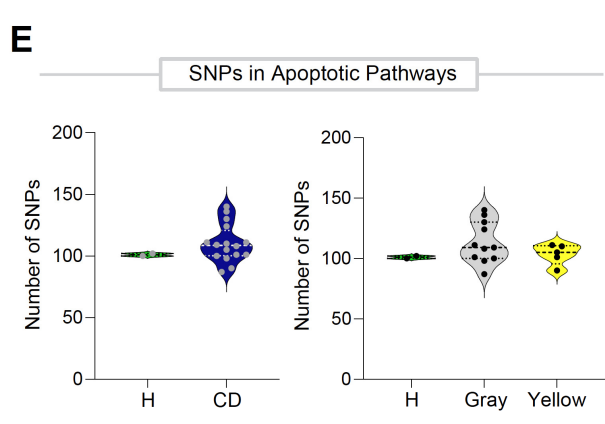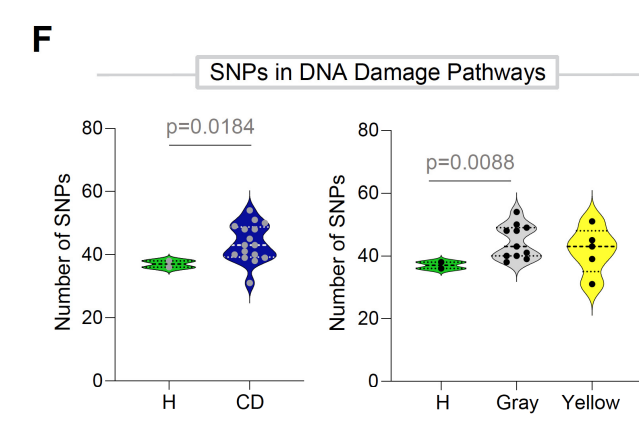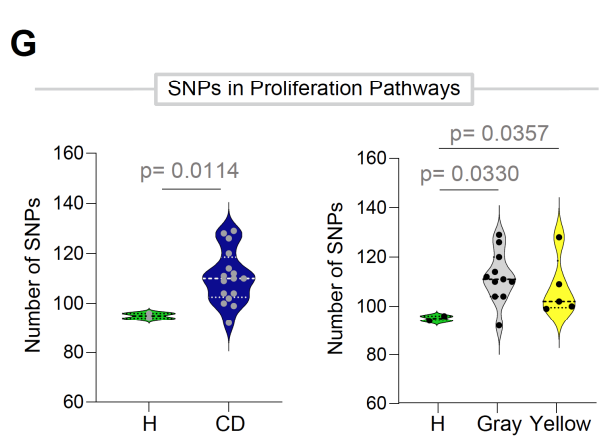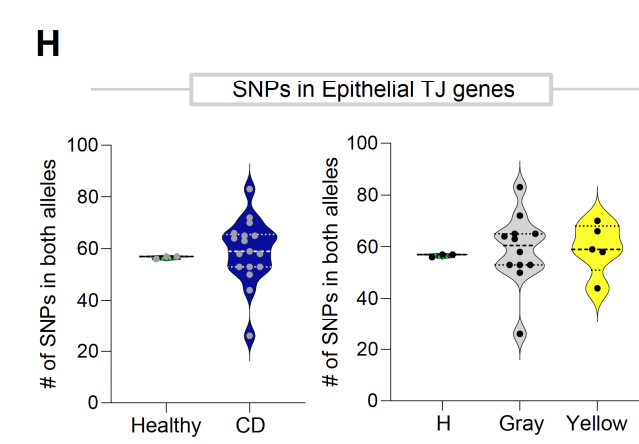

31 **Figure S6 [Related to Figure 2].**

1 **Genomic analysis of CD-PDOs.**

2 **A.** Table summarizing the current understanding of the contributions of genetics in CD.

3 **B.** Schematic showing the key steps in carrying out genomic analyses on healthy and CD-PDOs. See methods  
4 for details.

5 **C-H.** Violin plots display the frequency of SNPs, either in specific genes (C-D; e.g., *RET*, *POU5F1*) or in sets of  
6 genes that are involved in various pathways (E-H). Panels on the left compare healthy vs all CD-PDOs, whereas  
7 panels on the right compare healthy PDOs against the two molecular subtypes of CD, gray and yellow. Statistical  
8 significance was determined by Mann Whitney test (C *left*, D-H), and one way ANOVA (C right). The gene list  
9 for SNP analysis is provided as **Table S5**.

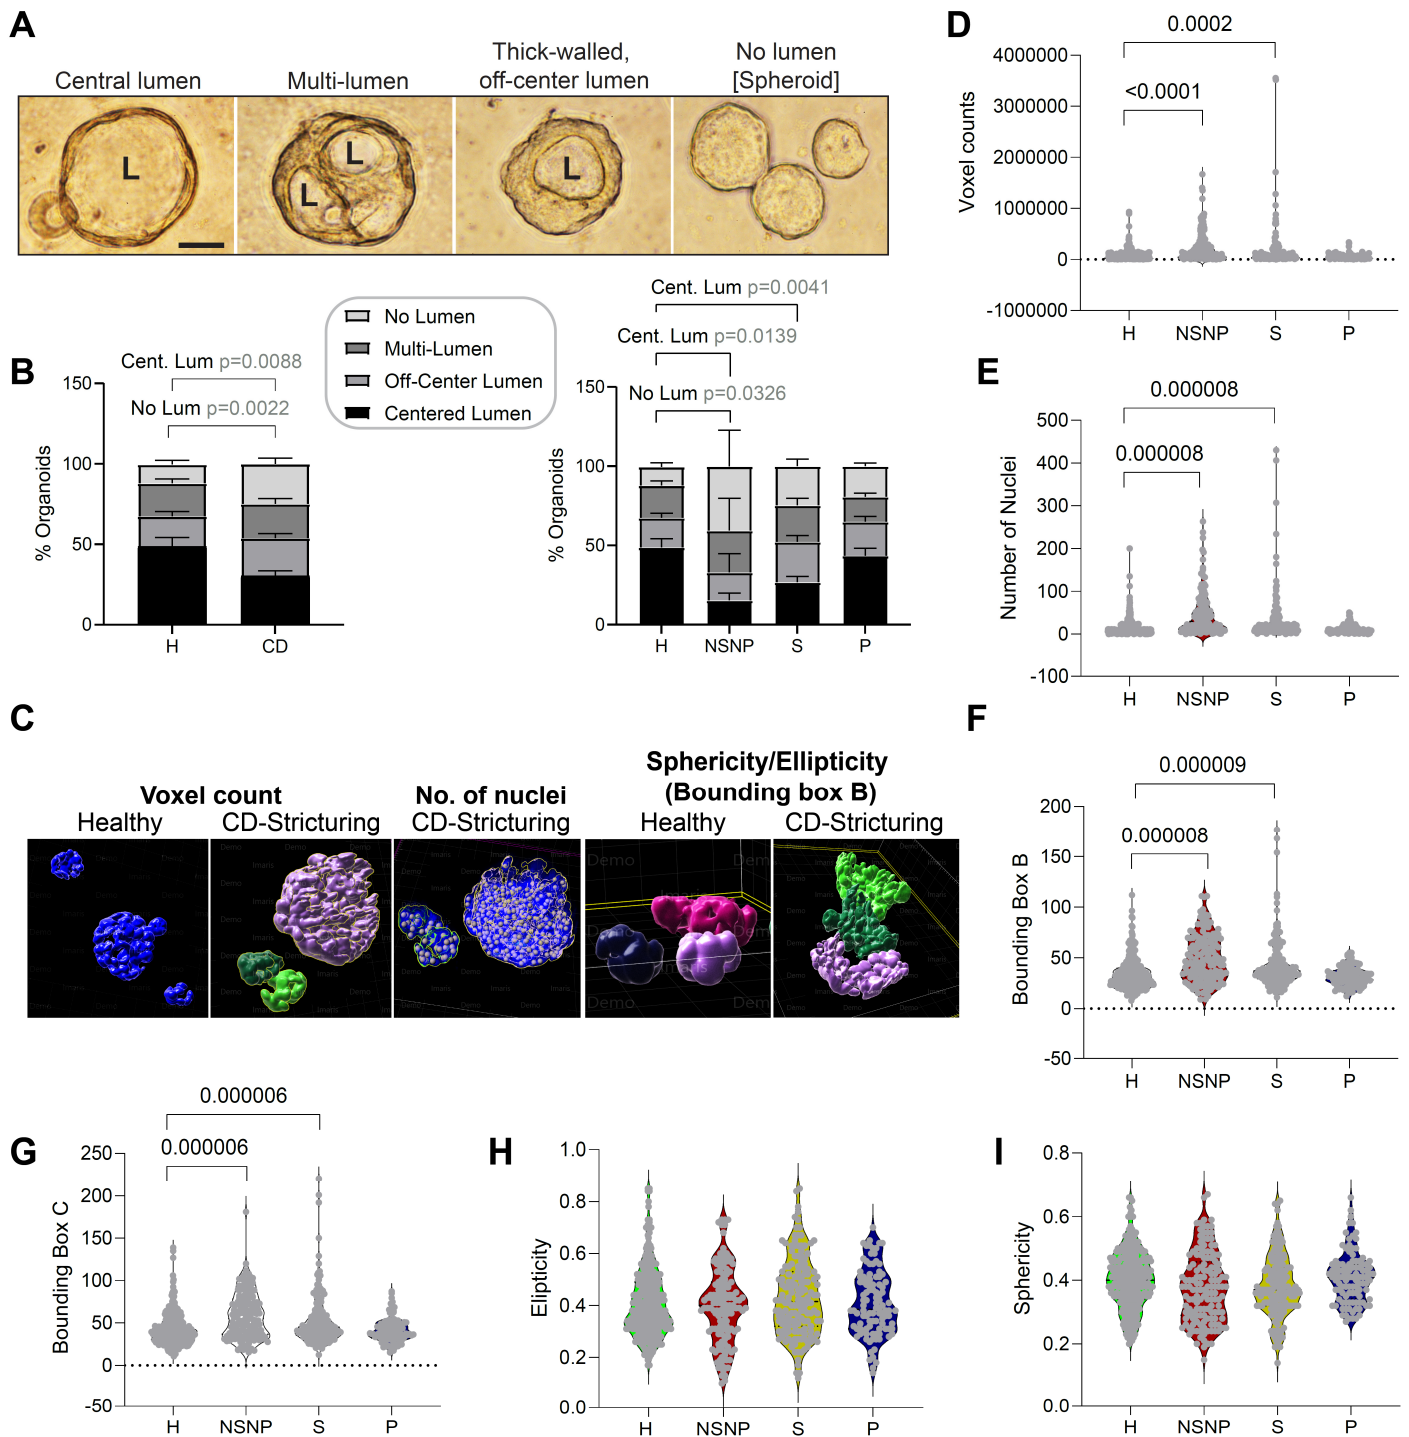

**Figure S7 [Related to Figure 3]**

**NSNP (B1)- and stricturing (B2) CD-PDOs show dysmorphic growth.**

**A-B.** Representative images of the 4 major types of organoid structures encountered in 3D cultures of CD-PDOs by light microscopy. Scale bar = 50  $\mu\text{m}$ . L = lumen. Stacked bar plots in B shows the quantification of the proportion of each type of organoid structure in various CD subtypes [B-left, all CD subtypes combined; B-right, separated into CD subtypes]. Statistical significance was assessed by one way ANOVA. Only significant  $p$  values are displayed ( $n = 3-8$  in each group).

**C-I.** Quantitative morphometrics were carried out on CD-PDOs using IMARIS. Various parameters were quantified and are represented as violin plots: voxel counts (D), number of nuclei (E), bounding box B (F) and bounding box C (G) and finally, ellipticity (H) and sphericity (I).

See [Table S2](#) for subjects used in each assay.

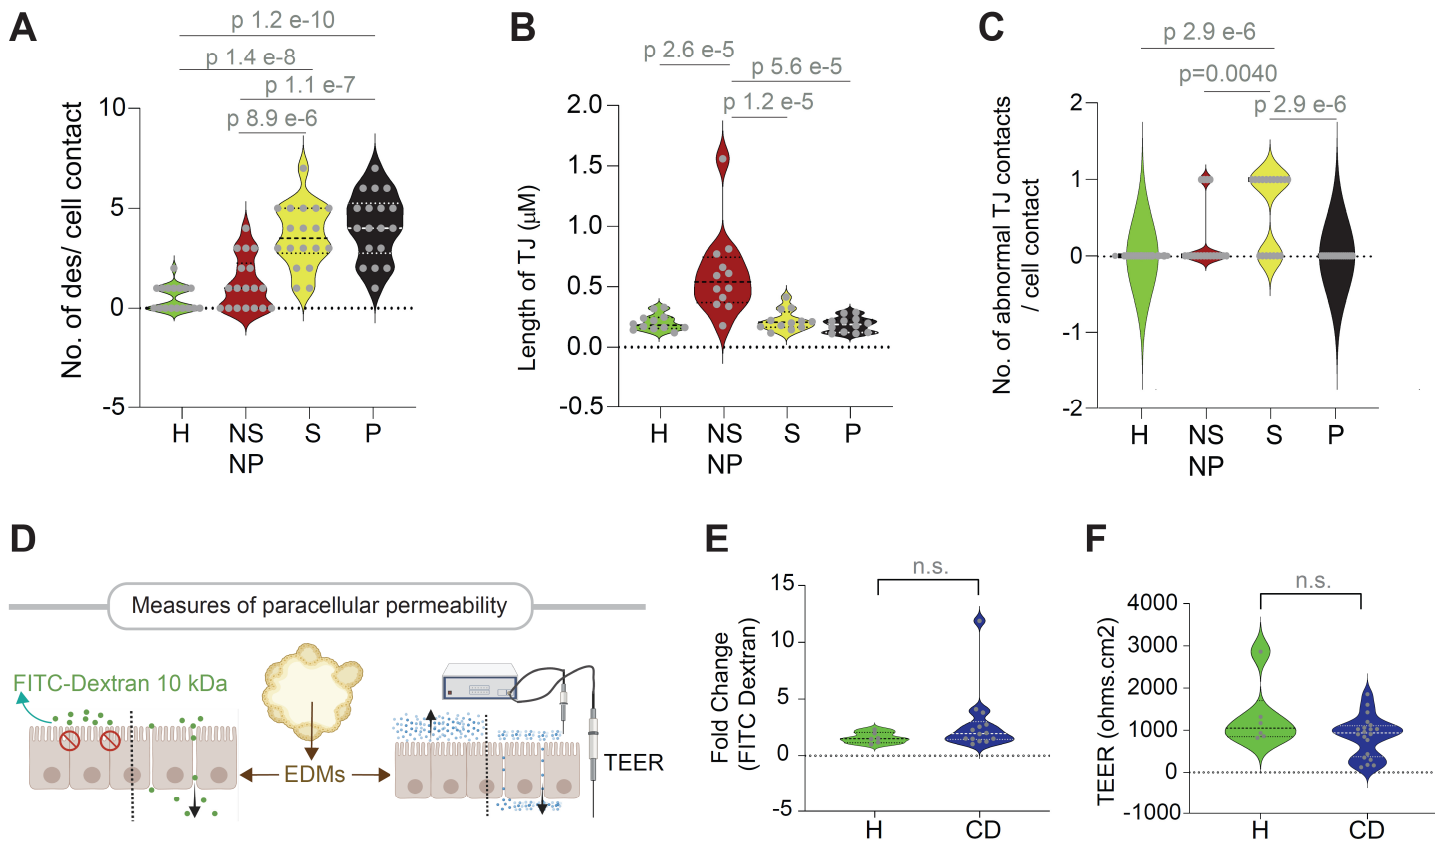

**Figure S8 [Related to Figure 3]**

**Characterization of the gut barrier integrity in monolayers derived from CD-PDOs.**

**A-C.** Violin plots display the quantification of no. of desmosomes/cell-cell contact (A), the length of TJ (B) and the frequency of abnormal defects/TJ structure (C) observed by TEM (in **Figure 3C-E**). Statistical significance was assessed by one way ANOVA (n = 7-13 fields analyzed in each subtype of PDO).

**D.** Schematic shows two different approaches used to assess barrier integrity of healthy vs CD EDMs.

**E.** Violin plots show the fold change in FITC dextran leakage in CD-EDMs compared to healthy controls [see **Figure 3J** for each clinical subtype of CD].

**F.** Violin plots show the fold change in TEER in CD-EDMs compared to healthy controls. No statistically significant changes were observed. See **Figure 3** for the visualization of these analyses based on each molecular subtype [3I-J] or clinical subtype [3K-L] of CD.

See **Table S2** for subjects used in each assay.

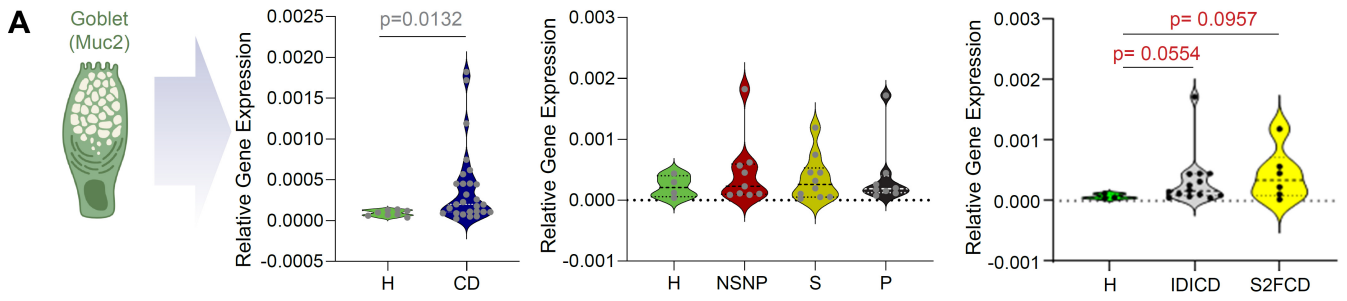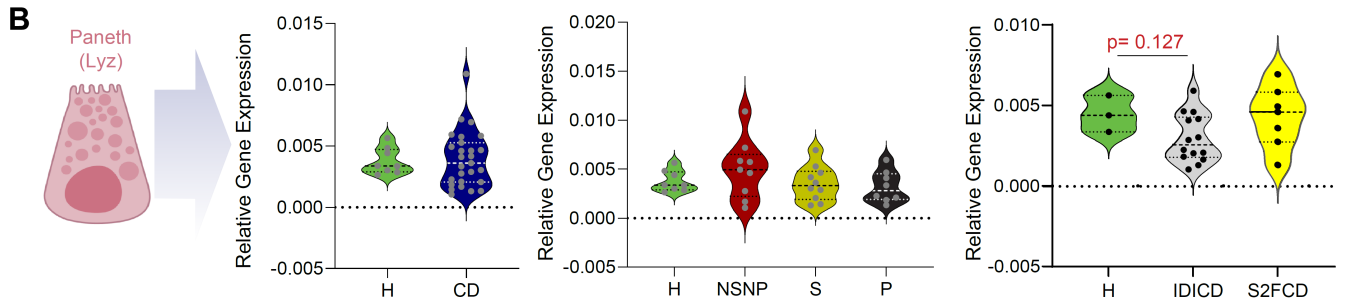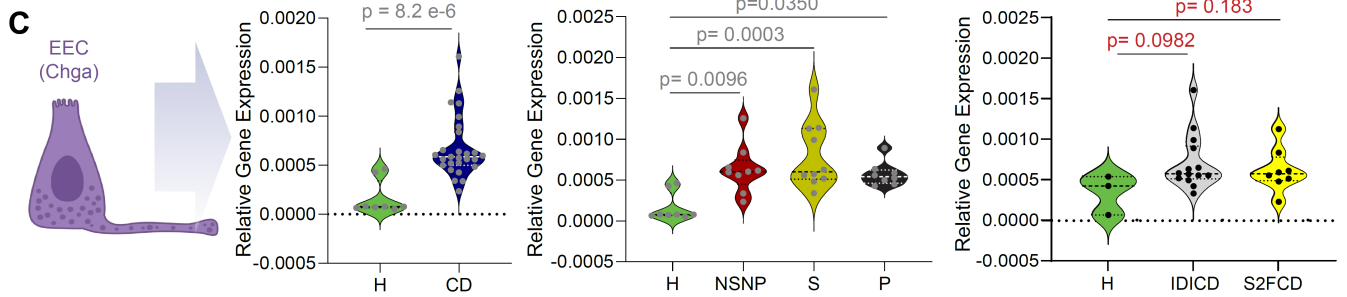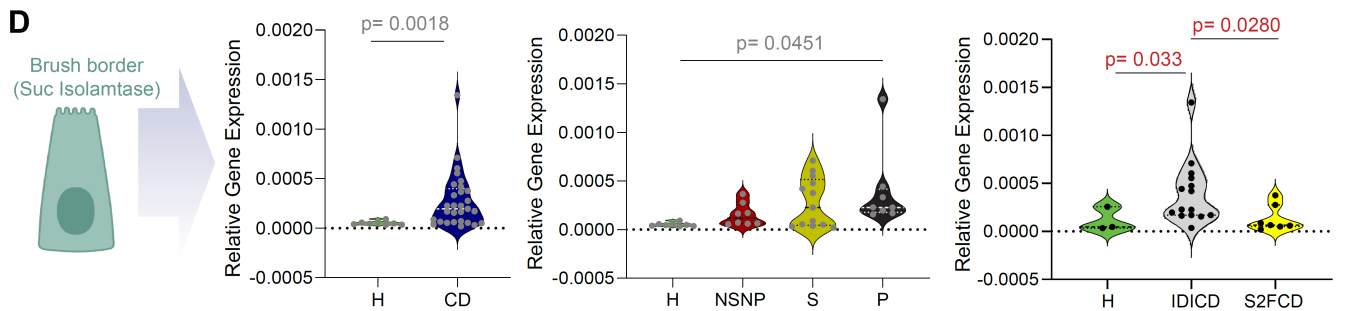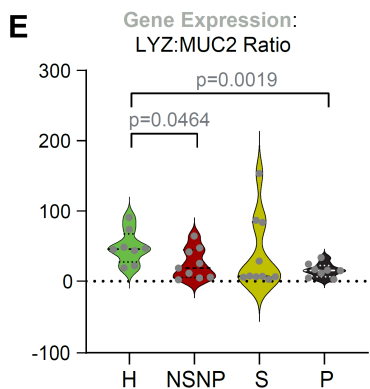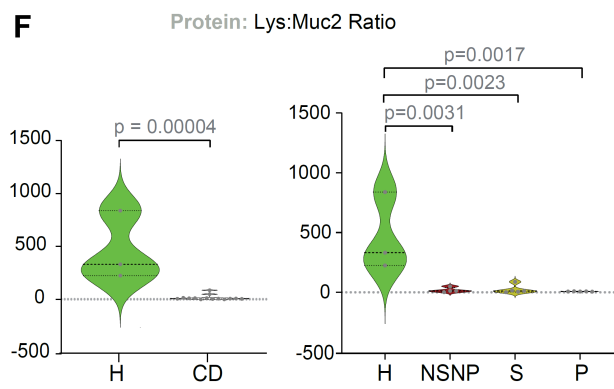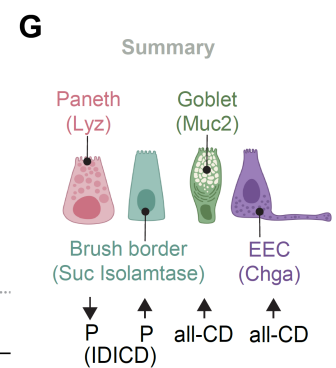

1 **Figure S9 [Related to Figure 4]**

2 **CD-PDOs retain evidence of altered cell composition.**

3 **A-D.** Violin plots show the relative abundance of transcripts of *MUC2* (A; a marker of goblet cells), *LYZ* (B; a marker of  
4 Paneth cells), *CHGA* (C; a marker of enteroendocrine cells) and *SI* (D; sucrose isomaltase, a marker of brush border cells)  
5 in CD-PDOs vs healthy controls [*left*, all CD subtypes combined; *right*, separated into CD subtypes]. Statistical significance  
6 was assessed by Mann-Whitney test (A-D *left*), one way ANOVA (A-D *middle*) and Welch's t-test (A-D *right*). Only significant  
7 *p* values are displayed (n = 6-15 subjects in each group).

8 **E.** Violin plots show the ratio of *LYZ* and *MUC2* transcripts (assessed by qPCR) in CD-PDOs vs healthy controls [see **Figure**  
9 **4B-left** all CD subtypes combined; **Figure 4B-right**, separated into the two molecular CD subtypes]. Statistical significance  
10 was assessed by Mann-Whitney analyses. Only significant *p* values are displayed (n = 6-15 subjects in each group).

11 **F.** Violin plots show the results of quantification of images in **Figure 4C**, wherein FFPE of CD-PDOs of IDICD subtypes  
12 were analyzed for goblet (*MUC2*; green) and Paneth (Lysozyme; red) cells by confocal immunofluorescence. expressed as  
13 ratio of lysozyme to *MUC2* in CD-PDOs vs healthy controls [*F-left*, all CD subtypes combined; *F-right*, separated into the  
14 clinical subtypes of CD]. Statistical significance was assessed by using unpaired t-test (*F-left*) and one way ANOVA (*F-*  
15 *right*). Only significant *p* values are displayed (n = 3-5 subjects in each group).

16 **G.** Schematic summarizing the cell type assessment analysis.

17 See **Table S2** for subjects used in each assay.

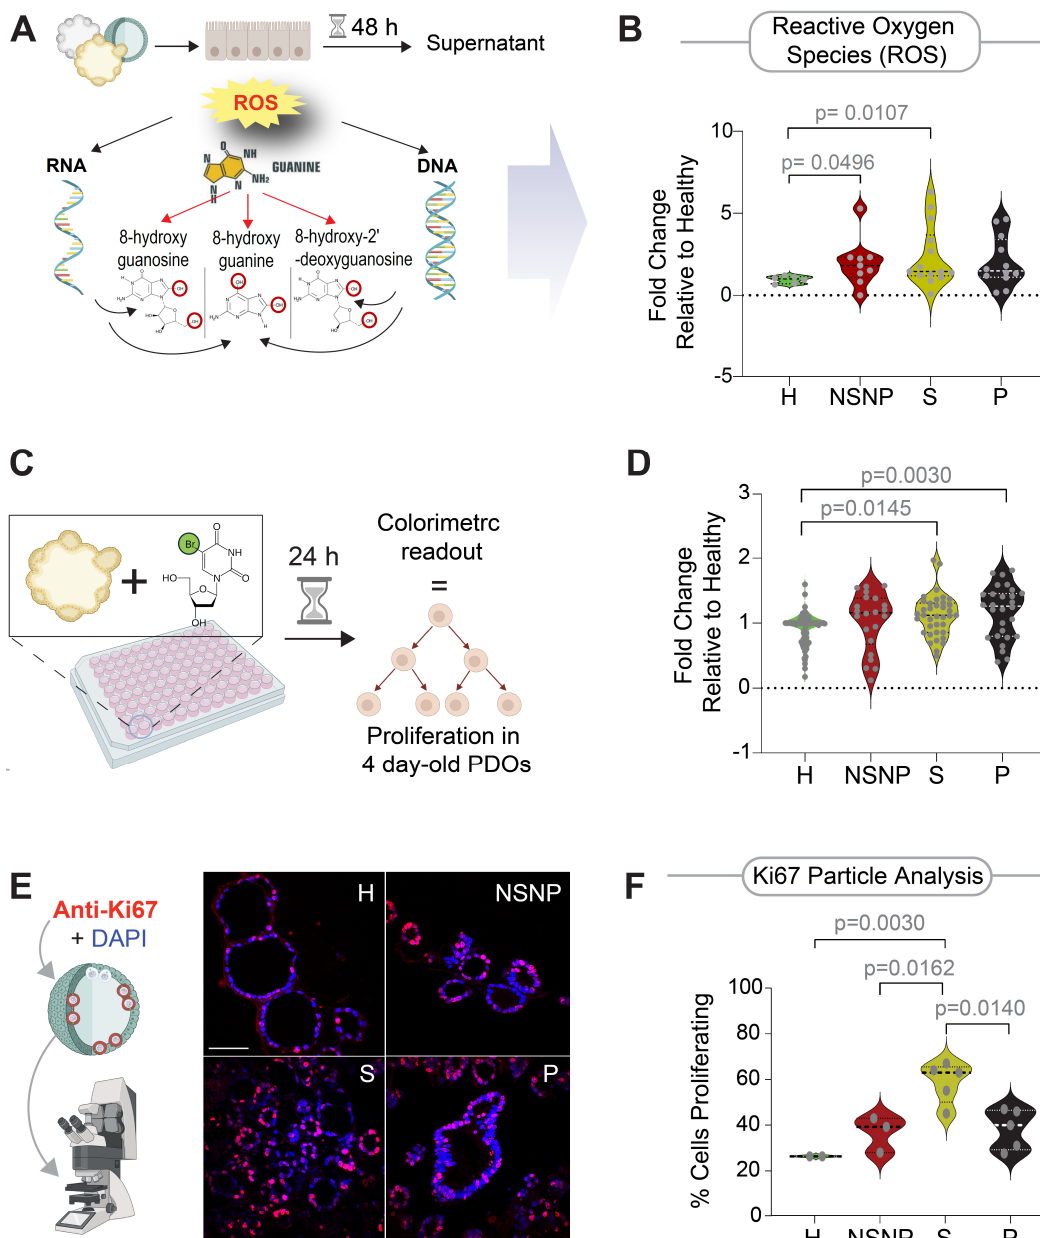

**Figure S10 [Related to Figure 4]**

**CD-PDOs retain evidence of high oxidative stress and proliferation.**

**A-B.** Schematic (A) summarizes the assessment of oxidized guanine nucleoside products from damaged DNA/RNA by ELISA. Violin plots (B) show the relative abundance of these products in the 3 clinical subtypes of CD-PDOs vs healthy controls. Statistical significance was assessed by Mann-Whitney test. Only significant  $p$  values are displayed ( $n = 5-10$  subjects in each CD group and  $n = 3$  healthy subjects). See **Figure 4F** for the display of findings as all CD combined or separated into the two molecular subtypes of CD.

**C-D.** Schematic (C) summarizes the proliferation assays performed wherein BrdU-incorporation over 24 h is assessed on four-day old CD-PDOs grown in 96-well plates prior to assessment by ELISA. Violin plots (D) show BrdU incorporation in the 3 clinical subtypes of CD-PDOs vs healthy controls. Statistical significance was assessed by one way ANOVA. Only significant  $p$  values are displayed ( $n = 5-8$  subjects in each group. H, healthy; NSNP, non-stricturing, non-penetrating; S, stricturing; P, penetrating. See **Figure 4G** for the display of the findings as all CD combined or separated into the two molecular subtypes of CD.

**E-F.** Schematic summarizes the assessment of Ki67 expression in PDOs by immunofluorescence staining followed by confocal microscopy (E) and Ki67 particle analysis (F). Statistical significance was assessed by one way ANOVA. Only significant  $p$  values are displayed ( $n = 2-5$  subjects in each group). See **Figure 4H** for the display of the findings as all CD combined or separated into the two molecular subtypes of CD.



1 It is noteworthy that the penetrating (P, B3) CD-PDOs showed significantly higher BrdU incorporation (**D**), but  
2 no significant increase in Ki67 staining (**F**). Because BrdU labels cells during the S phase [S4] and is seen in all  
3 phases of cell cycle, whereas Ki67 labels cells in all phases except G0 [S5], findings suggest that penetrating  
4 (P, B3) CD-PDOs may have more cells in G0 phase.

5  
6 See [Table S2](#) for subjects used in each assay.



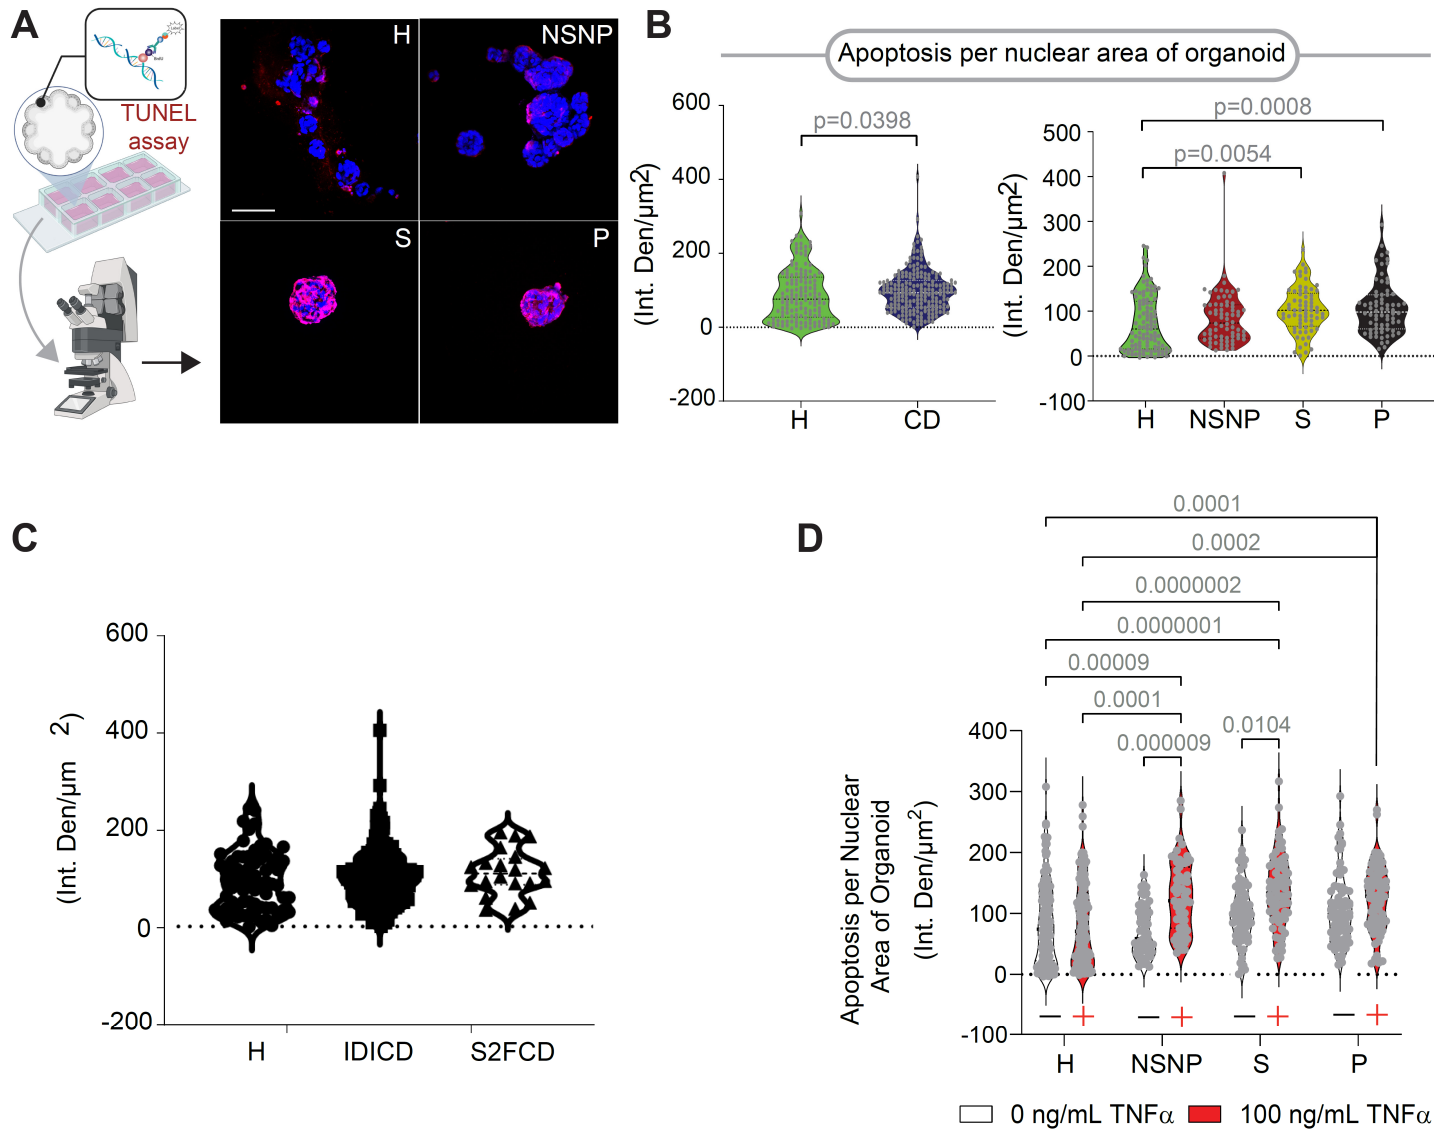

## Figure S11 [Related to Figure 4]

### CD-PDOs retain evidence of high apoptosis.

**A.** Schematic (A-left) summarizes the TUNEL assays performed wherein four-day old CD-PDOs prior to fixation and staining with anti-BrdU (red) and DAPI (nuclei; blue) and analysis by confocal imaging. Representative images (A-right) are shown. Scale bar = 150  $\mu\text{m}$

**B-C.** Violin plots show densitometry analysis of BrdU incorporation (red pixels) in the nuclei [B-left, all CD subtypes combined; B-right, separated into the clinical subtypes of CD; C, separated into the molecular subtypes of CD]. Statistical significance was assessed by Mann-Whitney (B-left) and one way ANOVA (B-right, C). Only significant  $p$  values are displayed ( $n = 5-6$  subjects in each group).

**D.** Findings of TUNEL assays performed wherein four-day old CD-PDOs are challenged with recombinant TNF $\alpha$  for 16 h prior to fixation and staining with anti-BrdU and analysis by confocal imaging. Violin plots show densitometry analysis of BrdU incorporation (red pixels) in the nuclei. Statistical significance was assessed by one way ANOVA ( $n = 5-6$  subjects in each group).

See [Table S2](#) for subjects used in each assay.

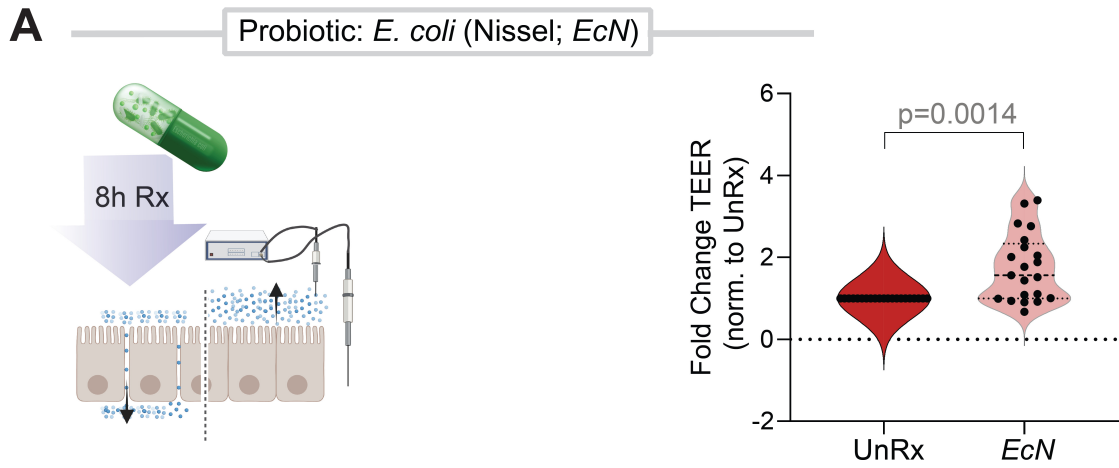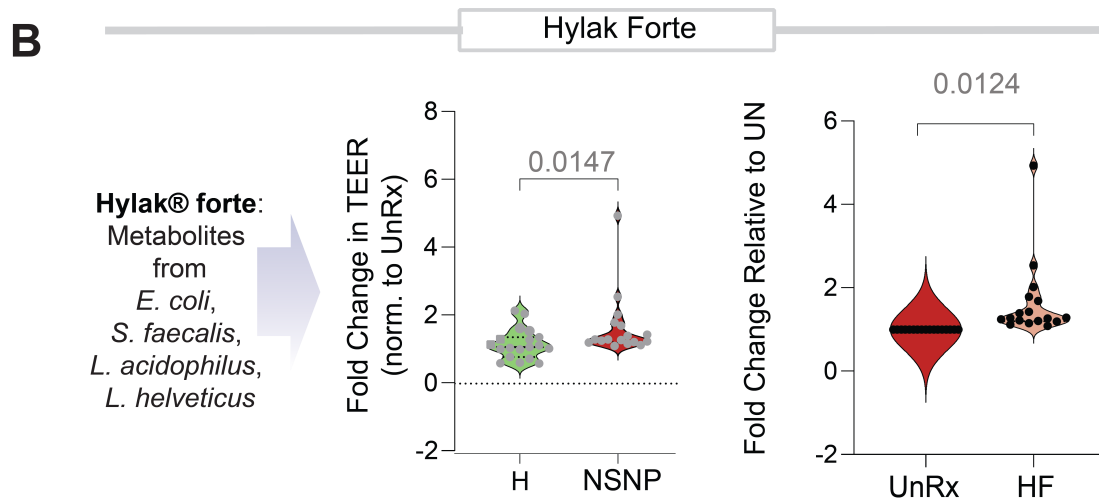

1  
2  
3 **Figure S12 [Related to Figure 5].**

4 **Barrier defects in NSNP CD-PDOs can be repaired using prebiotics and postbiotics.**

5 **A-B.** Reversal of the defects in the integrity of the gut barrier observed in NSNP-CD using either prebiotics (A;  
6 *E. coli* Nissel, *EcN*) or postbiotics (B; Hylak Forte®). Violin plots display the fold change in TEER compared to  
7 untreated control EDMs. Statistical analysis was performed using paired student t-test.

## Supplemental References

1. Moor, A.E., Harnik, Y., Ben-Moshe, S., Massasa, E.E., Rozenberg, M., Eilam, R., Bahar Halpern, K., and Itzkovitz, S. (2018). Spatial Reconstruction of Single Enterocytes Uncovers Broad Zonation along the Intestinal Villus Axis. *Cell* 175, 1156-1167. e11115. 10.1016/j.cell.2018.08.063.
2. Parikh, K., Antanaviciute, A., Fawkner-Corbett, D., Jagielowicz, M., Aulicino, A., Lagerholm, C., Davis, S., Kinchen, J., Chen, H.H., Alham, N.K., et al. (2019). Colonic epithelial cell diversity in health and inflammatory bowel disease. *Nature* 567, 49-55. 10.1038/s41586-019-0992-y.
3. Matt Kanke, M.M.K., Sean Connelly, Matthew Schaner, Michael T. Shanahan, Elisabeth A. Wolber, Caroline Beasley, Grace Lian, Animesh Jain, Millie D. Long, Edward L. Barnes, Hans H. Herfarth, Kim L. Isaacs, Jonathan J. Hansen, Muneera Kapadia<sup>6</sup>, José Gaston Guillem<sup>6</sup>, Terrence S. Furey, Shehzad Z. Sheikh, and Praveen Sethupathy (2021). Single-cell analysis of colonic epithelium reveals unexpected shifts in cellular composition and molecular phenotype in treatment-naïve adult Crohn's disease BioRxiv.
4. Matatall, K.A., Kadmon, C.S., and King, K.Y. (2018). Detecting Hematopoietic Stem Cell Proliferation Using BrdU Incorporation. *Methods Mol Biol* 1686, 91-103. 10.1007/978-1-4939-7371-2\_7.
5. Li, L.T., Jiang, G., Chen, Q., and Zheng, J.N. (2015). Ki67 is a promising molecular target in the diagnosis of cancer (review). *Mol Med Rep* 11, 1566-1572. 10.3892/mmr.2014.2914.
